# Supplementary material for: Differential Protein Expression Profiles in Glaucomatous Trabecular Meshwork: An Evaluation Study on a Small Primary Open Angle Glaucoma Population
Source: PubMed Central journal article supplement — Adv Ther. 2016 Jan 28;33(2):252–67. doi: 10.1007/s12325-016-0285-x (PMC4769730; doi:10.1007/s12325-016-0285-x), 2016-01-28
Supplement: 12325_2016_285_MOESM1_ESM.pdf [file 12325_2016_285_MOESM1_ESM.pdf]

## *Why carry out this study?*

- Primary open angle glaucoma (POAG) is a progressive optic neuropathy characterized by impaired aqueous outflow and extensive remodeling in the trabecular meshwork (TM).
- The aim of this study was to characterize and compare the expression patterns of selected proteins belonging to the tissue remodeling, inflammation and growth factor pathways in *ex-vivo* glaucomatous and control TMs using protein-array analysis.
- Protein profiles were evaluated using a chip-based array consisting of 60 literature selected antibodies.

## *What was learned from the study?*

- A different expression of some factors was observed in POAG TMs with respect to controls.
- The analysis of this small TM population highlighted some proteins linked to POAG, some previously reported and others of new detection (interleukin 7 [IL7], macrophage inflammatory proteins [MIPs], and soluble tumor necrosis factor receptor I [sTNF $\alpha$ RI]).

This summary slide represents the opinions of the authors. Sponsorship for this study was partially funded by the Fondazione Roma, the Italian Ministry of Health and the "National 5xMille 2010 tax donation to IRCCS-G.B. Bietti Foundation". For a full list of acknowledgments and disclosures for all authors of this article, please see the full text online. © The Author(s) 2015. Creative Commons Attribution Noncommercial License (CC BY-NC).
